# Supplementary material for: Bisulfite treatment and single-molecule real-time sequencing reveal D-loop length, position, and distribution
Source: eLife. 2020 Nov 13;9:e59111. doi: 10.7554/eLife.59111 (PMC7695462; doi:10.7554/eLife.59111)
Supplement: Source data 1. [file elife-59111-data1.xlsx]

## Sheet: Figure 2
	Data for Figure-2E							(not shown)					Gel			t40w50			t40w20
		Gel			t40w50			t40w20					Mean	SD	N	Mean	SD	N	Mean	SD	N
	ds98-931	24.0209	22.1241	19.138	16.3873	10.9903	10.9983	29.1744	16.7874	15.2284		ds98-931	21.761	2.46162	3	12.792	3.11366	3	20.3968	7.64154	3
	ds98-607	21.7	24.2844	16.1	11.8812	12.2024	10.2215	23.1966	12.2024	18.9097		ds98-607	20.6948	4.18379	3	11.435	1.06316	3	18.1029	5.54134	3
	ds98-197-78ss	10.1	16.2	11.97	6.53266	4.19287	10.3226	15.2429	10.9015	20		ds98-197-78ss	12.7567	3.12516	3	7.01604	3.09331	3	15.3814	4.55085	3
	Data for Figure-Supplement-1D:
	% D-loops longer than 350 nt
	ds98-931	ds98-607	ds98-197-78ss
	13.25	4	0
	8.33	5	0
	12	4.9	0
	Data for Figure-Supplement-2B:
		ds98-915-78ss				ds98-915				ds98-931				ds98-607				ds98-197-78ss
	Gel	28.2679	26.9691	18.3479	35.7006	20.755	26.6145	15.8237		41.0209	32.1241	29.138		21.7	24.2844	36.1		3.8526	3.3543	5.16129
	Reads	3.71903	22.6592	7.08207		6.01122	13.1715	11.3056		32.3718	27.044	11.0801	15.9931	20.7821	16.8122	18.7972		0.6
		ds98-915-78ss			ds98-915			ds98-931			ds98-607			ds98-197-78ss
	Gel	27.3214	7.11231	4	21.0644	5.40203	3	34.0943	6.18162	3	27.3615	7.67731	3	4.12273	0.933292	3
	Reads	11.1534	10.1052	3	10.1628	3.71443	3	21.6223	9.7941	4	18.7972	1.98494	3	0.6	0	1

## Sheet: Figure 3 Part-I
Data for Figures-3A-C:
	Fraction of D-loops in each bin
Position of bins (bp)	ds98-931*	ds98-607*	ds98-197-78ss*
0	0	0	0
100	0	0	0
200	0.00452745	0	0
300	0.00509338	0	0
400	0.00509338	0.00525624	0.0535714
500	0.00509338	0.0275953	0.196429
600	0.00339559	0.0932983	0.276786
700	0.00848896	0.157687	0.276786
800	0.0367855	0.224704	0.0267857
900	0.0662139	0.198423	0
1000	0.0843237	0.164258	0
1100	0.0911149	0.106439	0
1200	0.0962083	0.00262812	0
1300	0.0871534	0	0.00892857
1400	0.0973401	0	0.00892857
1500	0.107527	0	0.00892857
1600	0.0945105	0	0.00892857
1700	0.0730051	0	0
1800	0.0203735	0.00131406	0
1900	0.0316921	0.00394218	0.0267857
2000	0.0401811	0.00788436	0.0535714
2100	0.032824	0.0065703	0.0446429
2200	0.00848896	0	0.00892857
2300	0.000565931	0	0
2400	0	0	0
2500	0	0	0
2600	0	0	0
2700	0	0	0
	*Data were derived after cumulating all footprint containing reads across the replicates
	Homology windows for each substrate type indicated by a blue highlight

## Sheet: Figure 3 Part-II
	Data for Figure 3D:
		t40w50					t40w50				t40w20				t40w20
		D-LOOP LENGTH (NT)					ds98-931	ds98-607	ds98-197-78ss		D-LOOP LENGTH (NT)				ds98-931	ds98-607	ds98-197-78ss
		ds98-931	ds98-607	ds98-197-78ss		Number of values	448	167	33		ds98-931	ds98-607	ds98-197-78ss		Number of values	552	464	152
		256	220	231							221	132	180
		271	147	188		Minimum	100	110	131		166	174	182		Minimum	100	100	100
		294	205	210		25% Percentile	164	191	165.5		159	130	119		25% Percentile	128	123.3	119
		224	239	191		Median	208.5	222	205		119	136	140		Median	162	152	150
		202	218	153		75% Percentile	264	252	233.5		207	142	115		75% Percentile	202	189	180.8
		221	256	299		Maximum	773	489	312		136	214	139		Maximum	751	464	261
		173	255	208							294	186	115
		387	189	312		Mean	225.2	231.7	206.3		206	167	201		Mean	174.8	164.2	154
		287	222	266		Std. Deviation	92.04	60.68	48.62		101	143	207		Std. Deviation	70.57	55.25	39.4
		406	293	287		Std. Error	4.348	4.695	8.464		164	197	120		Std. Error	3.004	2.565	3.196
		280	328	190							119	114	100
		317	227	205		Lower 95% CI of mean	216.7	222.4	189		224	157	117		Lower 95% CI of mean	168.9	159.2	147.7
		166	211	213		Upper 95% CI of mean	233.8	241	223.5		180	123	123		Upper 95% CI of mean	180.7	169.3	160.3
		154	244	150							150	130	150
		234	204	209							202	153	102
		241	166	131							221	112	150
		267	211	236							173	415	132
		204	278	240							227	167	191
		194	259	192							206	221	133
		198	149	188							230	208	150
		262	204	165							100	241	153
		256	191	150							406	115	110
		232	255	214							119	132	181
		278	213	282							121	238	153
		478	370	288							163	143	166
		231	206	218							130	133	151
		229	265	206							108	103	145
		189	252	159							163	110	208
		251	186	159							248	260	107
		751	196	166							109	107	111
		208	278	185							182	115	164
		292	186	184							109	189	101
		202	222	132							142	103	133
		473	327								107	253	185
		407	255								205	121	211
		203	156								154	149	183
		773	246								165	130	132
		310	269								138	176	103
		187	167								234	456	177
		207	361								128	184	140
		126	229								241	130	261
		158	188								235	109	100
		175	185								204	116	201
		270	221								194	293	115
		307	282								136	139	153
		338	225								155	106	119
		210	142								107	111	150
		234	300								198	110	129
		211	186								115	114	149
		192	248								149	111	168
		301	241								161	350	101
		316	415								183	218	209
		258	167								155	199	131
		277	221								146	166	148
		375	241								104	181	240
		152	238								113	122	192
		268	213								219	186	150
		249	196								151	200	211
		224	260								231	109	150
		317	315								175	166	254
		121	229								189	241	203
		223	456								236	133	141
		229	184								751	153	150
		464	331								102	133	169
		205	184								143	230	102
		325	208								208	270	118
		224	378								189	226	114
		256	218								292	114	168
		239	199								202	212	100
		237	181								168	139	101
		203	190								230	195	219
		362	177								215	152	173
		361	270								110	252	180
		341	262								178	155	200
		231	195								150	127	208
		198	252								119	170	201
		377	200								111	200	101
		205	202								203	119	173
		209	128								149	139	201
		181	232								670	154	184
		193	181								141	178	119
		342	193								310	111	114
		252	233								187	151	165
		337	189								168	149	180
		256	224								114	122	256
		217	230								151	131	213
		318	189								144	128	179
		176	174								100	232	177
		228	218								190	188	140
		362	165								130	180	150
		234	184								123	130	135
		172	241								133	193	136
		677	235								176	211	105
		397	235								137	189	109
		509	226								166	188	180
		325	171								108	171	216
		188	259								114	145	177
		180	217								119	173	203
		170	201								126	101	123
		213	178								106	128	206
		219	232								118	129	129
		291	284								158	102	100
		252	478								132	131	151
		326	307								126	189	101
		239	223								175	115	117
		274	345								158	174	116
		329	204								177	218	119
		274	197								149	141	149
		318	190								105	157	103
		504	489								164	162	206
		216	212								241	106	164
		212	231								109	184	192
		184	244								210	140	115
		242	176								122	241	106
		148	210								142	148	114
		321	281								234	113	133
		181	227								211	203	130
		238	173								192	122	133
		299	179								301	140	219
		143	210								263	105	113
		151	202								258	188	139
		331	241								107	186	117
		147	181								132	178	177
		369	205								112	182	114
		222	216								225	116	105
		256	223								152	131	113
		253	211								155	111	109
		184	217								180	124	125
		311	239								165	152	140
		165	244								224	217	150
		234	149								317	100	150
		198	239								121	115	206
		152	292								223	140	144
		271	214								127	225	131
		417	280								141	186	159
		214	261								116	121	166
		101	316								144	157	185
		167	181								185	112	159
		255	224								100	133	208
		210	173								413	135	171
		223	213								174	235	188
		263	217								205	119	136
		265	236								139	134	151
		233	324								209	244	100
		205	191								165	205	174
		192	173								113	173	132
		213	248								195	129	223
		255	232								104	223	157
		374	183								158	177	254
		362	230								189	100	211
		193	184								165	147	130
		245	266								160	113	170
		258	152								296	207
		210	431								101	127
		264	239								226	109
		223	240								185	197
		262	239								191	116
		332	238								101	234
		317	207								231	102
		258	304								198	140
		262	110								106	165
		293	221								141	134
		267	304								377	164
		224	223								108	144
		356	185								153	464
		223	219								205	171
		209	225								209	175
		146									146	200
		181									181	155
		193									193	104
		122									122	208
		114									114	124
		172									172	143
		147									147	250
		100									100	176
		201									201	165
		256									256	189
		125									125	210
		161									161	157
		167									167	145
		242									242	114
		101									101	201
		176									176	102
		129									129	173
		147									147	127
		167									167	124
		197									197	104
		234									234	117
		172									172	175
		575									575	109
		106									106	159
		177									177	100
		105									105	114
		180									180	108
		397									397	131
		162									162	129
		164									164	222
		162									162	121
		118									118	112
		207									207	141
		177									177	125
		188									188	133
		180									180	205
		170									170	137
		213									213	123
		154									154	172
		247									247	165
		198									198	217
		143									143	259
		169									169	111
		175									175	209
		113									113	154
		107									107	212
		146									146	157
		184									184	131
		179									179	149
		167									167	239
		173									173	130
		137									137	157
		235									235	166
		267									267	103
		133									133	100
		177									177	181
		161									161	173
		202									202	261
		111									111	247
		174									174	142
		161									161	109
		147									147	164
		399									399	104
		194									194	177
		162									162	127
		212									212	181
		118									118	157
		121									121	116
		184									184	107
		133									133	194
		100									100	123
		115									115	134
		148									148	137
		270									270	173
		181									181	157
		143									143	108
		122									122	124
		238									238	177
		201									201	318
		116									116	135
		161									161	108
		103									103	236
		166									166	242
		143									143	175
		151									151	173
		241									241	358
		166									166	232
		214									214	116
		102									102	183
		132									132	230
		130									130	184
		187									187	233
		134									134	152
		147									147	431
		314									314	115
		152									152	189
		256									256	159
		164									164	100
		107									107	177
		253									253	103
		101									101	240
		162									162	189
		196									196	203
		184									184	114
		116									116	180
		127									127	195
		311									311	114
		100									100	194
		168									168	239
		147									147	163
		155									155	108
		119									119	247
		165									165	110
		141									141	166
		132									132	105
		157									157	149
		170									170	130
		198									198	149
		193									193	180
		193									193	132
		152									152	177
		150									150	171
		187									187	235
		174									174	223
		417									417	123
		144									144	148
		214									214	103
		146									146	142
		152									152	136
		196									196	100
		101									101	219
		109									109	133
		167									167	131
		132									132	120
		134									134	125
		190									190	228
		113									113	209
		223									223	181
		156									156	103
		205									205	153
		157									157	163
		154									154	136
		233									233	112
		205									205	103
		192									192	147
		213									213	113
		169									169	131
		177									177	186
		172									172	197
		168									168	135
		130									130	137
		303									303	146
		193									193	218
		147									147	222
		115									115	201
		121									121	129
		207									207	177
		245									245	189
		170									170	128
		134									134	174
		114									114	112
		210									210	103
		180									180	222
		174									174	202
		223									223	328
		105									105	108
		104									104	121
		204									204	131
		161									161	127
		307									307	135
		204									204	173
		258									258	168
		262									262	160
		184									184	244
		138									138	129
		125									125	200
		126									126	166
		267									267	105
		224									224	150
		254									254	104
		158									158	108
		105									105	211
		124									124	119
		285									113	146
		131									170	112
		175									132	208
		471									124	259
		236									163	126
		210									111	149
		207									225	157
		198									171	100
		217									135	179
		163									131	238
		251									100	204
		190									134	143
		279									124	123
		276									381	108
		343									134	140
		149									217	149
		213									184	191
		264									134	108
		227									108	114
		635									210	130
		354									152	171
		298									101	173
		168									105	234
		213									115	173
		159									190	143
		146									137	104
		263									144	150
		154									198	232
		252									217	165
		224									163	216
		197									190	269
		268									190	102
		179									202	102
		185									110	115
		207									105	164
		244									218	134
		213									122	124
		164									152	265
		360									128	226
		164									149	158
		222									115	157
		253									213	122
		177									179	268
		322									119	188
		237									154	408
		284									114	123
		214									635	242
		202									134	144
		289									248	150
		251									222	127
		434									148	118
		347									168	206
		206									204	121
		283									213	238
		336									146	153
		236									159	145
		281									146	186
		208									117	122
		209									119	147
		282									156	196
		243									231	104
		277									143	216
		237									154	186
		127									252	108
		485									194	121
		153									197	156
		109									179	153
		338									134	111
		354									179	291
		195									127	130
		191									106	204
		256									131	149
		287									185	156
		292									207	132
		266									214	246
		213									113	269
		361									160	108
		241									114	121
		315									213	167
		408									106	190
		190									164	105
		364									287	361
		260									118	108
		289									164	160
		271									222	147
		269									203	188
		317									177	237
		211									163	185
		266									214	225
		328									135	232
		274									126	114
		141									149	173
		263									111	213
		263									198	181
		328									111	145
		276									163	149
		153									202	201
		121									133	111
											158	170
											262	235
											107	127
											136	108
											251	128
											375	196
											127	147
											268	148
											147	161
											161	130
											107	195
											187	124
											336	159
											132	121
											236	171
											211	133
											126
											162
											190
											178
											160
											209
											192
											243
											203
											117
											100
											127
											485
											120
											187
											101
											168
											136
											126
											153
											158
											109
											184
											115
											338
											112
											133
											175
											187
											187
											214
											135
											191
											183
											163
											150
											214
											179
											131
											112
											266
											130
											115
											154
											119
											271
											108
											135
											205
											126
											241
											256
											133
											116
											122
											118
											123
											106
											261
											190
											205
											260
											195
											198
											122
											134
											218
											121
											202
											100
											317
											120
											145
											211
											107
											266
											244
											124
											141
											223
											157
											256
											198
											145
											101
											128
											153
											121

## Sheet: Figure 4 Part-I
	Data for Figure-4D:					Data for Figure-Supplement-3D:				Data for Figure-Supplement-3E:
		Fraction of D-loops in each bin					Fraction of D-loops in each bin				Fraction of D-loops in each bin
	Position of bins (bp)	ds98-915-78ss*	ds98-915*			Position of bins (bp)	ds98-931*			Position of bins (bp)	ds98-607*
	0	0	0			0	0			0	0
	100	0	0			100	0			100	0
	200	0.00119856	0			200	0.00109051			200	0
	300	0.00159808	0			300	0.00109051			300	0
Homology window: 915 bp	400	0.00279664	0			400	0.00109051		Homology window: 607 bp	400	0.004
	500	0.0211746	0.0141093			500	0			500	0.018
	600	0.0535358	0.0511464			600	0			600	0.072
	700	0.0842988	0.0811287		Homology window: 931 bp	700	0.00763359			700	0.16
	800	0.111067	0.118166			800	0.04253			800	0.2
	900	0.123052	0.137566			900	0.0697928			900	0.202
	1000	0.127447	0.146385			1000	0.0992366			1000	0.166
	1100	0.130244	0.142857			1100	0.112323			1100	0.12
	1200	0.103875	0.116402			1200	0.130861			1200	0.016
	1300	0.0779065	0.0864198			1300	0.124318			1300	0
	1400	0.0595286	0.0687831			1400	0.126499			1400	0
	1500	0.00759089	0.010582			1500	0.109051			1500	0
	1600	0.00159808	0.00352734			1600	0.087241			1600	0
	1700	0.00119856	0.00176367			1700	0.0687023			1700	0
	1800	0.00479425	0.00176367			1800	0.00545256			1800	0.002
	1900	0.0235717	0.00705467			1900	0.00436205			1900	0.01
	2000	0.0303636	0.005291			2000	0.00436205			2000	0.014
	2100	0.0251698	0.00352734			2100	0.00327154			2100	0.012
	2200	0.00719137	0.00176367			2200	0.00109051			2200	0.004
	2300	0.000799041	0.00176367			2300	0			2300	0
	2400	0	0			2400	0			2400	0
	2500	0	0			2500	0			2500	0
	2600	0	0			2600	0			2600	0
	2700	0	0			2700	0			2700	0
	*Data were derived after cumulating all footprint containing reads across the replicates

## Sheet: Figure 4 Part-II
						Data for Figure-4E:									Data for Figure-4F:
						D-loop length (nt)									D-loop length (nt)
						ds98-931	ds98-915	ds98-915-78ss			ds98-931	ds98-915	ds98-915-78ss		ds98-931	ds98-607	ds98-197-78ss			ds98-931	ds98-607	ds98-197-78ss
						156	398	190		Number of values	669	3969	1050		156	301	179		Number of values	669	160	102
						289	237	338							289	186	157
						306	204	262		Minimum	105	101	102		306	481	164		Minimum	105	104	102
						234	245	296		25% Percentile	259.5	237	205.8		234	437	155		25% Percentile	259.5	234	146
						411	275	622		Median	327	310	279		411	207	146		Median	327	308	167.5
						111	830	245		75% Percentile	478	413	391		111	182	144		75% Percentile	478	410	203
						346	283	237		Maximum	1105	1205	945		346	287	200		Maximum	1105	597	317
						719	563	327							719	329	152
						347	247	374		Mean	389.8	338.7	317.6		347	297	118		Mean	389.8	326.2	176.5
						763	288	157		Std. Deviation	191.1	145	160.4		763	360	203		Std. Deviation	191.1	108.7	42.75
						272	442	269		Std. Error	7.39	2.302	4.949		272	184	275		Std. Error	7.39	8.591	4.233
						665	266	144							665	283	141
						315	236	290		Lower 95% CI of mean	375.3	334.2	307.8		315	208	253		Lower 95% CI of mean	375.3	309.3	168.1
						333	162	151		Upper 95% CI of mean	404.3	343.2	327.3		333	481	211		Upper 95% CI of mean	404.3	343.2	184.9
						264	183	289							264	397	191
						342	270	132		Sum	260782	1344000	333438		342	288	182		Sum	260782	52196	18003
						691	369	482							691	216	282
						228	320	233							228	267	233
						268	358	175							268	208	165
						472	193	117							472	304	167
						433	753	459							433	277	176
						281	288	205							281	359	150
						495	696	198							495	275	203
						316	214	304							316	418	213
						737	834	149							737	391	317
						155	249	277							155	174	139
						297	184	242							297	526	170
						214	570	489							214	262	135
						174	365	226							174	556	216
						339	141	389							339	216	144
						682	336	367							682	447	102
						159	788	230							159	305	251
						190	325	314							190	207	136
						340	371	200							340	106	115
						289	252	382							289	420	140
						168	320	128							168	386	141
						190	362	291							190	216	159
						493	406	451							493	301	269
						486	390	188							486	396	187
						364	231	564							364	283	197
						264	382	145							264	367	147
						279	298	210							279	446	180
						483	127	344							483	282	159
						154	114	218							154	529	146
						241	424	342							241	198	186
						303	323	273							303	466	168
						348	362	373							348	359	165
						261	186	458							261	597	104
						403	350	350							403	365	233
						266	140	175							266	364	146
						258	555	710							258	370	144
						252	329	362							252	336	236
						320	263	476							320	229	203
						142	173	219							142	195	147
						279	475	251							279	342	155
						365	319	363							365	439	130
						314	191	262							314	198	154
						292	328	416							292	372	192
						448	303	225							448	206	204
						445	206	424							445	238	170
						268	286	386							268	208	151
						608	102	495							608	228	136
						353	216	167							353	288	235
						169	252	210							169	249	267
						420	781	138							420	217	105
						579	375	181							579	587	113
						289	238	279							289	447	200
						586	299	330							586	342	204
						790	249	838							790	276	162
						195	553	141							195	172	180
						438	265	287							438	549	167
						307	334	422							307	131	211
						497	454	146							497	299	136
						879	253	427							879	421	151
						437	162	236							437	412	133
						190	141	177							190	333	269
						308	215	408							308	304	220
						251	241	238							251	230	155
						485	137	138							485	410	170
						368	143	172							368	255	209
						252	194	305							252	249	201
						589	399	353							589	363	137
						243	279	331							243	405	196
						181	366	449							181	298	140
						151	224	376							151	417	203
						314	248	193							314	494	254
						265	221	382							265	384	153
						509	148	160							509	337	144
						342	218	399							342	382	152
						478	249	217							478	419	171
						200	313	260							200	104	183
						351	440	226							351	411	171
						108	272	266							108	359	192
						260	485	329							260	428	147
						679	285	317							679	430	220
						726	331	215							726	214	193
						388	575	285							388	299	170
						130	327	250							130	191	184
						423	655	248							423	285	158
						264	541	221							264	316	165
						278	215	267							278	355	111
						364	494	310							364	238	137
						290	270	385							290	296
						194	726	303							194	234
						393	308	195							393	537
						280	311	264							280	288
						461	466	796							461	449
						318	361	151							318	328
						588	253	285							588	234
						690	336	310							690	371
						538	325	241							538	489
						391	327	249							391	281
						265	471	431							265	196
						272	497	308							272	347
						448	180	442							448	154
						218	258	222							218	309
						406	273	649							406	216
						198	329	242							198	415
						151	175	139							151	279
						255	278	324							255	251
						858	402	402							858	207
						274	204	456							274	457
						213	348	311							213	175
						740	139	332							740	478
						199	277	140							199	345
						534	485	373							534	477
						177	379	204							177	307
						173	160	144							173	414
						340	257	349							340	371
						266	599	161							266	209
						381	388	379							381	468
						236	142	199							236	199
						508	381	298							508	410
						129	281	301							129	148
						917	525	263							917	241
						633	345	391							633	546
						309	106	193							309	368
						227	522	571							227	223
						377	421	233							377	380
						409	253	267							409	323
						294	202	419							294	342
						325	408	255							325	214
						608	230	185							608	448
						594	557	435							594	388
						867	148	111							867	549
						348	204	331							348	233
						105	141	416							105	260
						686	351	210							686	397
						204	415	318							204	292
						242	244	296							242	217
						688	372	209							688	236
						309	231	158							309	244
						187	232	538							187	481
						477	103	356							477	445
						370	340	275							370	388
						735	523	264							735	245
						267	548	172							267	250
						772	269	378							772	309
						278	226	610							278	216
						655	285	140							655	564
						593	375	477							593
						428	262	488							428
						294	286	268							294
						401	147	607							401
						738	311	171							738
						204	118	305							204
						374	386	201							374
						261	179	673							261
						279	198	205							279
						264	343	199							264
						431	502	359							431
						298	244	224							298
						256	190	141							256
						198	437	330							198
						249	253	154							249
						425	168	246							425
						369	238	298							369
						214	373	320							214
						329	159	156							329
						343	162	159							343
						464	373	218							464
						329	467	343							329
						273	322	154							273
						315	175	345							315
						244	182	138							244
						370	202	442							370
						220	286	369							220
						781	325	253							781
						910	292	188							910
						228	339	196							228
						407	180	460							407
						841	271	253							841
						373	500	197							373
						322	166	228							322
						729	289	574							729
						708	1054	402							708
						229	217	194							229
						309	454	154							309
						212	177	625							212
						284	216	416							284
						302	215	175							302
						272	673	205							272
						434	233	109							434
						142	183	177							142
						314	302	103							314
						219	359	637							219
						432	206	294							432
						280	188	334							280
						197	386	190							197
						316	647	445							316
						246	339	292							246
						833	1205	255							833
						299	400	272							299
						268	184	249							268
						279	171	287							279
						256	244	380							256
						271	262	381							271
						253	145	166							253
						275	321	296							275
						728	343	287							728
						1030	486	144							1030
						730	681	378							730
						525	364	330							525
						263	401	251							263
						557	223	249							557
						296	118	272							296
						187	322	261							187
						404	366	597							404
						509	508	320							509
						858	380	293							858
						278	377	157							278
						236	470	394							236
						321	470	209							321
						266	237	435							266
						501	384	190							501
						434	559	104							434
						707	133	173							707
						334	487	260							334
						405	299	275							405
						218	497	275							218
						668	145	300							668
						772	278	500							772
						359	244	399							359
						277	491	195							277
						226	390	324							226
						179	150	191							179
						141	241	142							141
						318	310	222							318
						419	230	521							419
						338	324	210							338
						901	625	487							901
						253	443	212							253
						280	339	147							280
						332	155	269							332
						321	291	470							321
						470	321	384							470
						190	397	147							190
						441	216	313							441
						495	248	273							495
						478	453	308							478
						624	259	134							624
						249	151	171							249
						289	219	113							289
						879	202	652							879
						403	375	157							403
						301	373	426							301
						483	281	400							483
						394	133	189							394
						528	284	266							528
						163	808	655							163
						264	359	560							264
						234	360	159							234
						264	272	139							264
						310	492	343							310
						409	278	414							409
						298	249	795							298
						169	187	260							169
						400	356	339							400
						406	310	698							406
						442	413	227							442
						234	436	247							234
						345	711	201							345
						551	353	455							551
						224	107	244							224
						278	330	329							278
						229	680	217							229
						779	421	309							779
						434	357	521							434
						135	318	104							135
						901	349	217							901
						501	130	409							501
						694	217	215							694
						334	255	212							334
						901	424	211							901
						715	313	390							715
						332	200	323							332
						421	263	140							421
						291	213	245							291
						242	322	636							242
						202	171	250							202
						354	220	685							354
						351	500	104							351
						255	175	417							255
						832	273	282							832
						390	136	173							390
						284	295	805							284
						515	294	595							515
						391	236	323							391
						794	529	373							794
						910	339	410							910
						340	419	127							340
						339	318	361							339
						460	700	382							460
						294	145	348							294
						635	562	253							635
						200	322	175							200
						204	271	168							204
						541	166	535							541
						407	341	282							407
						237	285	284							237
						414	357	432							414
						385	230	211							385
						411	419	391							411
						773	239	219							773
						296	365	855							296
						275	244	542							275
						814	323	447							814
						278	433	154							278
						235	185	215							235
						594	256	156							594
						338	234	303							338
						357	300	525							357
						467	288	279							467
						238	254	283							238
						312	422	206							312
						305	686	667							305
						326	289	359							326
						606	484	170							606
						310	320	238							310
						777	510	521							777
						598	234	155							598
						358	534	116							358
						293	426	225							293
						397	263	400							397
						230	339	266							230
						264	111	823							264
						288	178	204							288
						253	120	290							253
						481	272	157							481
						265	253	134							265
						265	163	204							265
						229	262	216							229
						231	479	230							231
						457	262	152							457
						147	287	337							147
						274	405	368							274
						544	464	377							544
						223	364	230							223
						230	422	216							230
						192	352	246							192
						275	156	161							275
						494	847	239							494
						293	709	365							293
						383	267	154							383
						264	244	141							264
						303	214	181							303
						383	378	243							383
						191	333	190							191
						338	265	102							338
						252	631	676							252
						204	193	273							204
						239	218	581							239
						787	369	150							787
						277	149	565							277
						480	669	195							480
						354	241	281							354
						602	313	316							602
						233	182	217							233
						322	529	256							322
						174	244	415							174
						308	182	274							308
						515	597	310							515
						309	267	317							309
						704	287	142							704
						343	500	263							343
						284	345	236							284
						309	288	346							309
						426	195	278							426
						473	798	334							473
						321	501	246							321
						204	180	256							204
						390	814	232							390
						252	309	582							252
						236	152	183							236
						318	554	166							318
						218	517	285							218
						829	220	339							829
						258	304	357							258
						227	250	516							227
						252	373	253							252
						282	127	314							282
						249	200	271							249
						307	516	179							307
						366	144	836							366
						844	232	162							844
						270	315	537							270
						580	318	136							580
						206	269	402							206
						504	827	290							504
						879	266	165							879
						747	142	117							747
						332	248	546							332
						805	410	593							805
						231	318	232							231
						747	414	337							747
						474	313	198							474
						272	107	219							272
						403	114	120							403
						229	597	207							229
						396	168	167							396
						470	332	139							470
						312	318	225							312
						751	145	486							751
						371	277	795							371
						585	481	323							585
						330	146	231							330
						485	307	164							485
						217	471	415							217
						395	155	247							395
						234	439	737							234
						298	489	225							298
						187	218	840							187
						269	403	132							269
						252	751	628							252
						278	228	362							278
						427	644	224							427
						248	255	106							248
						199	206	205							199
						502	264	232							502
						990	296	236							990
						295	587	185							295
						251	374	398							251
						428	323	611							428
						351	189	327							351
						297	268	211							297
						421	607	107							421
						487	265	172							487
						262	447	190							262
						361	275	268							361
						438	277	509							438
						514	156	729							514
						451	193	351							451
						553	415	355							553
						780	147	481							780
						388	529	306							388
						792	286	486							792
						661	249	184							661
						897	499	264							897
						204	241	291							204
						451	354	243							451
						487	154	117							487
						373	433	211							373
						246	309	467							246
						234	296	213							234
						260	376	291							260
						224	241	320							224
						384	129	402							384
						372	202	313							372
						569	149	252							569
						308	557	104							308
						322	169	129							322
						1105	278	120							1105
						272	405	239							272
						304	215	246							304
						230	334	550							230
						514	144	145							514
						251	354	228							251
						299	296	232							299
						465	339	319							465
						264	485	189							264
						763	228	283							763
						263	303	242							263
						329	246	597							329
						268	340	326							268
						277	251	728							277
						252	505	196							252
						343	593	347							343
						227	435	470							227
						183	402	216							183
						168	314	732							168
						214	241	281							214
						213	136	179							213
						222	546	242							222
						315	323	142							315
						632	140	124							632
						237	421	159							237
						282	539	246							282
						268	151	221							268
						214	216	365							214
						190	249	329							190
						258	307	253							258
						289	440	500							289
						208	205	133							208
						151	277	402							151
						326	503	150							326
						318	436	446							318
						295	478	203							295
						225	278	304							225
						234	289	289							234
						262	315	267							262
						431	325	264							431
						264	235	289							264
						372	135	170							372
						495	790	312							495
						259	138	175							259
						339	436	147							339
						296	180	164							296
						370	140	107							370
						438	154	283							438
						368	325	244							368
						481	101	767							481
						364	369	198							364
						335	585	190							335
						309	496	252							309
						321	312	255							321
						339	268	609							339
						420	384	508							420
						433	223	430							433
						441	118	330							441
						586	421	300							586
						485	473	339							485
						534	199	576							534
						540	259	155							540
						607	361	136							607
						232	422	645							232
						124	277	237							124
						279	216	130							279
						281	369	295							281
						278	627	223							278
						290	476	140							290
						207	358	175							207
						242	651	565							242
						198	167	190							198
						290	382	433							290
						329	457	479							329
						124	123	325							124
						941	617	246							941
						691	317	578							691
						718	450	360							718
						641	227	346							641
						769	587	215							769
						737	473	161							737
						879	220	299							879
						888	342	341							888
						787	490	299							787
						861	289	227							861
						740	183	291							740
						758	244	367							758
						876	367	397							876
						846	451	374							846
						680	310	170							680
						738	216	485							738
						781	379	275							781
						910	211	125							910
						849	240	623							849
						260	408	126							260
						411	455	485							411
						331	609	236							331
						403	365	290							403
						461	408	273							461
						377	173	546							377
						373	164	207							373
						278	422	488							278
						320	409	391							320
						382	269	270							382
						303	290	343							303
						233	375	355							233
						130	249	336							130
						231	291	151							231
						190	261	215							190
						220	151	299							220
						236	318	285							236
						448	101	294							448
						408	298	468							408
						440	421	286							440
						509	248	430							509
						364	594	124							364
						534	423	679							534
						343	338	397							343
						401	235	451							401
						401	589	394							401
						722	342	190							722
						669	234	169							669
						440	456	280							440
						682	303	301							682
						496	423	399							496
						590	151	145							590
						679	737	433							679
						538	237	315							538
						538	499	171							538
						633	120	215							633
						724	220	116							724
						689	333	207							689
						735	260	710							735
						656	313	216							656
						790	424	240							790
						274	411	228							274
						355	438	327							355
						319	208	279							319
						351	136	151							351
						296	260	495							296
						338	264	135							338
						281	260	891							281
						279	275	118							279
						282	516	166							282
						490	668	125							490
						484	292	305							484
						521	247	115							521
						355	190	282							355
						403	262	282							403
						523	337	210							523
						438	509	137							438
						469	148	216							469
						406	152	503							406
						348	280	140							348
						477	372	608							477
						478	462	188							478
						475	179	170							475
						527	647	217							527
						289	419	159							289
						319	246	276							319
						346	359	189							346
						265	329	476							265
						238	151	880							238
						249	356	760							249
						349	409	704							349
						484	282	238							484
						613	369	143							613
						333	297	320							333
						281	339	406							281
						259	271	253							259
						303	153	760							303
						314	252	520							314
						312	138	236							312
						327	328	743							327
						322	334	420							322
						273	276	434							273
						261	241	150							261
						279	435	239							279
						275	372	289							275
						274	653	189							274
						340	311	215							340
						252	117	156							252
						331	202	163							331
						232	508	244							232
						227	183	166							227
						261	447	194							261
						169	260	219							169
						210	231	311							210
						218	355	482							218
						211	252	550							211
						231	238	124							231
						187	448	220							187
						190	241	334							190
						162	625	363							162
						143	252	426							143
						155	221	291							155
						143	504	656							143
						115	334	155							115
							213	260
							460	241
							224	232
							381	137
							190	612
							346	781
							670	375
							351	216
							242	503
							303	129
							443	241
							494	298
							265	339
							356	246
							484	441
							225	148
							237	434
							225	473
							254	775
							157	206
							290	479
							167	242
							271	299
							373	481
							429	310
							474	222
							416	421
							254	374
							344	226
							579	382
							398	269
							328	445
							479	373
							569	208
							404	309
							170	719
							508	155
							278	357
							177	541
							128	165
							352	400
							398	375
							437	343
							142	190
							190	199
							428	353
							231	436
							588	187
							225	207
							148	248
							228	465
							298	430
							282	232
							147	239
							691	143
							222	234
							456	260
							203	242
							223	216
							349	434
							364	182
							291	159
							253	347
							324	626
							143	201
							682	584
							442	128
							275	480
							639	684
							542	234
							374	391
							117	192
							226	752
							252	208
							416	777
							383	168
							175	142
							442	377
							414	113
							335	154
							219	311
							251	224
							334	749
							256	153
							191	296
							636	485
							156	331
							284	288
							140	268
							214	307
							157	224
							434	217
							251	568
							365	240
							502	134
							307	450
							434	311
							367	271
							106	244
							577	288
							394	234
							370	223
							180	392
							430	236
							164	527
							276	154
							440	298
							735	319
							148	257
							334	160
							335	314
							142	448
							322	141
							487	234
							211	165
							521	145
							812	277
							511	153
							317	289
							656	326
							271	274
							457	237
							142	369
							358	261
							541	656
							274	779
							271	358
							345	149
							186	105
							174	223
							437	407
							266	264
							328	230
							217	190
							176	161
							616	527
							261	582
							392	278
							661	136
							219	273
							234	250
							137	295
							553	176
							255	417
							115	166
							370	589
							541	153
							391	645
							101	408
							240	257
							467	240
							196	174
							606	292
							264	227
							364	842
							537	211
							248	260
							201	197
							374	116
							352	278
							156	160
							576	814
							297	212
							667	545
							150	376
							160	208
							419	238
							275	235
							189	436
							389	494
							245	632
							266	653
							322	245
							373	394
							354	130
							175	309
							211	404
							283	157
							236	137
							235	384
							231	198
							461	197
							502	175
							299	156
							527	433
							229	600
							301	289
							222	479
							907	314
							247	291
							505	303
							341	497
							165	136
							277	285
							295	255
							280	379
							347	446
							192	313
							577	720
							261	230
							480	390
							339	396
							338	119
							283	153
							276	169
							316	145
							147	226
							233	214
							298	279
							122	366
							220	223
							192	207
							253	540
							276	306
							289	328
							283	304
							311	426
							244	331
							640	116
							144	390
							281	309
							811	175
							348	124
							144	109
							145	150
							136	159
							237	164
							291	243
							417	157
							731	390
							730	412
							287	311
							309	315
							204	297
							205	405
							500	361
							429	262
							738	225
							277	269
							349	244
							229	198
							184	672
							286	870
							390	417
							371	136
							206	349
							295	152
							367	213
							233	744
							277	231
							227	545
							267	233
							322	338
							215	136
							416	856
							161	141
							328	315
							590	375
							266	232
							551	283
							537	216
							145	219
							315	799
							376	469
							424	217
							249	339
							313	226
							543	410
							408	332
							154	377
							341	431
							372	364
							314	585
							620	304
							257	556
							480	342
							101	322
							520	206
							370	283
							487	292
							408	269
							379	233
							588	181
							193	142
							210	383
							473	425
							177	326
							227	343
							227	376
							232	701
							328	236
							156	340
							186	255
							714	839
							775	285
							238	316
							230	193
							118	298
							318	478
							265	408
							358	252
							312	225
							267	360
							151	790
							586	416
							190	283
							285	310
							414	352
							376	807
							503	510
							395	237
							490	426
							377	364
							380	633
							841	196
							231	424
							310	276
							215	277
							217	346
							283	198
							560	473
							235	132
							279	285
							340	221
							426	158
							272	448
							771	470
							295	170
							348	196
							180	267
							330	430
							426	293
							329	180
							379	291
							363	305
							196	418
							215	353
							366	768
							404	127
							618	232
							324	667
							324	218
							222	442
							193	324
							223	456
							163	483
							135	390
							422	584
							299	463
							141	262
							352	568
							231	366
							183	424
							143	230
							703	262
							204	190
							256	728
							389	292
							276	184
							408	415
							141	945
							732	331
							136	645
							410	179
							401	285
							146	208
							658	246
							215	440
							315	516
							267	547
							273	226
							214	280
							433	581
							252	236
							148	521
							251	344
							219	348
							175	158
							288	269
							424	444
							329	266
							314
							419
							315
							293
							189
							300
							263
							421
							382
							215
							380
							241
							217
							738
							315
							402
							311
							384
							148
							226
							344
							174
							232
							157
							181
							246
							248
							629
							130
							268
							374
							673
							241
							246
							194
							434
							579
							223
							775
							304
							475
							165
							271
							290
							263
							181
							199
							311
							379
							231
							656
							278
							294
							344
							320
							342
							336
							127
							371
							340
							118
							275
							178
							297
							167
							257
							308
							266
							379
							341
							251
							399
							231
							163
							502
							163
							256
							344
							646
							408
							169
							186
							467
							463
							263
							231
							592
							391
							225
							165
							291
							273
							323
							298
							261
							341
							444
							727
							272
							359
							217
							129
							484
							369
							180
							254
							318
							142
							125
							257
							510
							564
							258
							485
							358
							322
							314
							246
							262
							174
							146
							175
							228
							318
							559
							361
							170
							679
							418
							176
							150
							271
							310
							334
							275
							268
							380
							299
							268
							429
							466
							329
							278
							408
							280
							261
							211
							457
							454
							196
							261
							230
							215
							273
							243
							325
							478
							472
							367
							289
							203
							295
							190
							479
							352
							156
							297
							378
							334
							351
							322
							266
							244
							227
							376
							388
							230
							272
							307
							324
							231
							217
							586
							292
							160
							274
							457
							310
							282
							471
							429
							233
							244
							171
							800
							268
							277
							625
							324
							687
							275
							309
							311
							232
							562
							427
							192
							209
							338
							216
							376
							355
							442
							351
							363
							278
							595
							339
							237
							429
							439
							374
							218
							313
							381
							252
							133
							134
							472
							204
							468
							273
							442
							251
							162
							752
							377
							251
							369
							551
							421
							228
							568
							301
							236
							246
							232
							189
							218
							243
							617
							299
							502
							296
							367
							153
							166
							363
							341
							280
							715
							254
							456
							399
							287
							147
							231
							142
							519
							496
							305
							406
							395
							173
							363
							347
							135
							252
							271
							251
							278
							191
							209
							291
							704
							377
							275
							702
							186
							308
							238
							311
							444
							466
							290
							593
							279
							310
							185
							310
							231
							152
							227
							105
							225
							344
							575
							189
							617
							109
							410
							264
							495
							114
							277
							526
							489
							159
							255
							595
							149
							211
							502
							375
							159
							181
							500
							460
							295
							816
							206
							265
							399
							217
							329
							260
							598
							413
							152
							311
							277
							169
							799
							228
							342
							353
							237
							275
							362
							438
							410
							429
							147
							155
							289
							295
							274
							279
							159
							572
							312
							248
							263
							252
							268
							386
							301
							183
							127
							328
							244
							555
							509
							270
							510
							585
							322
							352
							271
							293
							369
							291
							276
							500
							211
							278
							610
							374
							375
							177
							559
							291
							384
							248
							219
							279
							217
							455
							231
							618
							178
							208
							322
							555
							456
							289
							306
							322
							233
							734
							238
							150
							403
							730
							359
							226
							391
							184
							321
							364
							261
							509
							252
							467
							163
							135
							639
							299
							660
							223
							256
							288
							158
							217
							202
							311
							435
							247
							355
							355
							308
							286
							339
							118
							256
							311
							270
							382
							160
							365
							286
							527
							475
							266
							226
							556
							192
							159
							232
							141
							376
							324
							343
							142
							283
							465
							252
							171
							501
							314
							166
							523
							103
							276
							438
							261
							444
							165
							290
							263
							120
							430
							251
							106
							244
							507
							473
							185
							227
							323
							338
							223
							309
							157
							152
							331
							483
							325
							542
							542
							247
							398
							146
							329
							382
							565
							412
							468
							515
							669
							523
							344
							218
							237
							228
							375
							231
							206
							469
							331
							148
							302
							364
							382
							294
							187
							385
							335
							412
							203
							270
							333
							174
							661
							362
							271
							182
							423
							283
							361
							499
							215
							370
							440
							343
							478
							235
							381
							410
							635
							393
							356
							375
							311
							234
							472
							250
							339
							252
							278
							246
							635
							430
							279
							249
							218
							126
							223
							264
							271
							198
							159
							307
							647
							807
							259
							369
							181
							207
							230
							339
							473
							244
							216
							270
							258
							183
							238
							228
							201
							438
							387
							268
							365
							334
							281
							615
							267
							258
							474
							259
							321
							739
							129
							176
							315
							560
							346
							292
							332
							328
							214
							279
							327
							113
							255
							251
							340
							543
							369
							402
							483
							399
							254
							163
							326
							379
							255
							190
							276
							190
							315
							283
							409
							294
							157
							209
							536
							329
							346
							426
							263
							201
							382
							346
							308
							310
							637
							551
							241
							429
							118
							755
							244
							209
							253
							362
							232
							437
							446
							181
							266
							323
							419
							360
							226
							437
							235
							392
							330
							291
							356
							236
							274
							352
							162
							656
							307
							236
							637
							118
							533
							309
							117
							521
							180
							117
							388
							196
							314
							222
							266
							214
							227
							281
							221
							283
							210
							328
							701
							244
							405
							193
							408
							252
							314
							207
							399
							261
							247
							168
							455
							358
							338
							502
							136
							550
							274
							257
							215
							360
							236
							276
							244
							346
							314
							546
							409
							181
							130
							369
							205
							265
							315
							329
							251
							374
							206
							205
							252
							302
							213
							532
							267
							233
							512
							320
							249
							111
							296
							439
							157
							537
							193
							264
							244
							209
							170
							215
							230
							607
							216
							309
							364
							302
							226
							266
							201
							514
							305
							151
							382
							440
							394
							342
							212
							157
							266
							271
							322
							165
							146
							441
							223
							224
							358
							129
							215
							224
							349
							184
							207
							215
							325
							244
							213
							323
							315
							460
							309
							329
							217
							341
							305
							205
							142
							305
							263
							287
							194
							295
							190
							257
							211
							301
							106
							542
							241
							302
							169
							503
							858
							665
							377
							280
							388
							219
							129
							247
							484
							278
							301
							217
							385
							289
							739
							220
							274
							258
							193
							319
							717
							670
							289
							272
							365
							232
							483
							402
							271
							451
							179
							559
							252
							409
							469
							284
							276
							692
							426
							324
							500
							323
							281
							598
							550
							430
							441
							532
							293
							285
							232
							383
							185
							747
							114
							266
							342
							440
							398
							719
							270
							837
							306
							242
							439
							265
							248
							429
							211
							612
							125
							675
							153
							322
							399
							293
							680
							224
							681
							461
							250
							364
							312
							244
							268
							360
							178
							218
							232
							322
							230
							344
							265
							492
							368
							102
							279
							204
							329
							340
							375
							528
							143
							199
							244
							128
							373
							267
							256
							282
							423
							334
							311
							169
							164
							315
							430
							395
							268
							172
							566
							213
							277
							237
							277
							431
[truncated: 1,972 more rows]

## Sheet: Figure Supplement 4
	Data for Figure-Supplement-4E:				Data for Figure-Supplement-4F:			Data for Figure-Supplement-5H:
		Fraction of D-loops in each bin
	Position of bins (bp)	Supercoiled*	Linear*		ds98-931				Supercoiled		Linear
	0	0	0		D-loop Length (nt)			Gel	1.5	1.8	3.5	3.3
	100	0.00653595	0		Supercoiled	Linear		Reads	1.9	1.2	3.1	1.9
	200	0.00653595	0.00359712		135	353
	300	0.00653595	0.00359712		199	226
	400	0	0.00359712		318	234
	500	0	0.00359712		160	237
	600	0	0.00359712		272	196
Homology window: 931 bp	700	0	0		308	247
	800	0.0261438	0.0251799		220	307
	900	0.0326797	0.0539568		235	283
	1000	0.0653595	0.0683453		324	243
	1100	0.104575	0.0791367		255	271
	1200	0.104575	0.107914		275	394
	1300	0.0980392	0.107914		383	275
	1400	0.124183	0.125899		295	279
	1500	0.111111	0.143885		396	361
	1600	0.104575	0.122302		280	596
	1700	0.0915033	0.0971223		363	207
	1800	0.00653595	0.0143885		225	861
	1900	0.0261438	0.00719424		236	255
	2000	0.0392157	0.0143885		282	255
	2100	0.0261438	0.0143885		288	374
	2200	0.0196078	0		255	294
	2300	0	0		410	238
	2400	0	0		458	202
	2500	0	0		314	427
	2600	0	0		310	553
	2700	0	0		322	627
					237	499
	*Data were derived after cumulating all footprint containing reads across the replicates				255	573
					200	682
					177	268
					201	293
					221	246
					181	371
					183	246
					240	274
					204	441
					141	427
					145	491
					145	383
					230	403
					196	383
					139	415
						505
						375
						254
						232
						216
						274
						203
						266
						392
						387
						205
						236
						215
						191
						208
						181
						201
						160
						216
						306
						246
						202
						178
						151
						120

## Sheet: Figure 5
	Data for Figure-5A:
		t25w20			t40w20			t60w20			t25w50			t40w50
	Top Strand	15.74	50.35	41.73	25.11	34.24	22.98	8.34	11.23	2.05	38.44	46.86	36.35	15.74	21.69	10.47
	Bottom Strand	17.28	15.86	1.83	2.31	1.9	0.05	0.04	0.05	0	13.18	12.3	0.97	0.66	0.56	0
		t25w20			t40w20			t60w20			t25w50			t40w50
	Top Strand	35.94	10.402	3	27.4433	3.45351	3	7.20667	2.70995	3	40.55	3.21217	3	15.9667	3.24092	3
	Bottom Strand	11.6567	4.9304	3	1.42	0.69515	3	0.03	0.0152753	3	8.81667	3.93155	3	0.406667	0.205372	3
	Data for Figure-5C:								Data for Figure-5D:
		D-loop length (nt)								Fraction of D-loops In each bin
	Peak Threshold:	t25w50	t40w50	t25w20	t40w20	t60w20			Position of bins (bp)	t25w50	t40w50	t25w20	t40w20	t60w20
		186	389	167	111	111			0	0	0	0	0	0
		203	928	186	143	129			100	0	0	0	0	0
		588	414	111	259	273			200	0.00261097	0.00109051	0.00296883	0.000865052	0
		501	233	319	306	126			300	0.00261097	0.00109051	0.00346363	0.000865052	0
		114	452	191	130	136			400	0.00174064	0.00109051	0.00197922	0.000865052	0
		519	512	289	133	147			500	0.000435161	0	0.000989609	0	0
		118	484	114	124	111			600	0.00174064	0	0.00197922	0	0
		164	844	337	116	161		Homology window: 931 bp	700	0.0156658	0.00763359	0.00593765	0	0
		199	457	118	174	331			800	0.0365535	0.04253	0.0395844	0.0397924	0.0344828
		204	416	101	161	100			900	0.0613577	0.0697928	0.0628402	0.0631488	0.0721003
		317	504	164	152	200			1000	0.0813751	0.0992366	0.0915388	0.0908304	0.103448
		264	785	199	322	140			1100	0.0979112	0.112323	0.10094	0.113322	0.137931
		343	262	204	100	367			1200	0.103568	0.130862	0.113805	0.145329	0.166144
		265	485	153	130	120			1300	0.104874	0.124318	0.112321	0.134083	0.163009
		202	305	264	110	204			1400	0.10705	0.126499	0.119248	0.128028	0.128527
		188	350	166	112	316			1500	0.0957354	0.109051	0.1143	0.115052	0.0940439
		273	374	113	346	133			1600	0.0844212	0.087241	0.0920336	0.0882353	0.0595611
		346	433	265	719	119			1700	0.0652742	0.0687023	0.0667986	0.0579585	0.0407524
		457	297	110	396	103			1800	0.0356832	0.00545256	0.00841168	0.0017301	0
		528	202	202	267	159			1900	0.0295909	0.00436205	0.0118753	0.00519031	0
		231	512	116	132	253			2000	0.0300261	0.00436205	0.0158337	0.00519031	0
		217	730	234	755	151			2100	0.0265448	0.00327154	0.0188026	0.00432526	0
		370	301	215	143	190			2200	0.0113142	0.00109051	0.0103909	0.00432526	0
		255	365	457	108	128			2300	0.00348129	0	0.00197922	0.000865052	0
		235	257	411	114	109			2400	0.000435161	0	0	0	0
		442	303	120	665	162			2500	0	0	0.000989609	0	0
		275	280	106	170	138			2600	0	0	0.000989609	0	0
		229	577	111	112	109			2700	0	0	0	0	0
		123	361	217	101	161
		346	830	370	182	174
		224	325	133	169	117
		242	380	182	333	152
		895	324	230	119	178
		469	216	213	264	103
		421	867	143	242	104
		886	438	123	115	114
		856	350	346	129	174
		134	308	719	128	242
		384	426	469	475	134
		150	124	206	178	146
		926	451	674	122	181
		170	468	149	193	181
		186	403	139	165	124
		155	421	763	414	103
		315	340	134	433	535
		230	226	143	281	117
		540	228	272	134	246
		427	266	150	333	151
		536	228	665	178	213
		130	214	170	224	271
		219	322	142	607	283
		602	272	101	161	233
		273	437	229	118	173
		262	493	230	153	132
		135	350	336	155	264
		355	243	257	194	149
		416	243	333	113	332
		354	365	102	162	102
		150	321	100	205	116
		211	686	130	107	151
		808	295	109	105	197
		772	272	178	339	152
		633	337	264	369	144
		435	497	112	273	331
		604	255	200	117	175
		130	527	111	277	139
		175	244	264	168	137
		433	524	302	124	107
		281	785	117	190	130
		703	691	281	349	124
		485	384	208	185	101
		361	331	535	289	106
		290	337	691	105	164
		427	380	485	128	113
		316	427	268	124	101
		737	720	201	447	172
		318	768	440	406	103
		199	263	116	127	129
		469	527	433	200	187
		284	765	115	129	159
		204	337	281	137	236
		266	117	100	109	167
		297	469	510	162	285
		373	235	485	227	178
		301	319	251	108	235
		322	193	316	224	134
		171	837	737	154	137
		325	243	318	291	179
		322	298	199	241	136
		100	478	363	234	176
		100	251	198	205	100
		340	384	155	104	113
		195	599	251	403	117
		632	657	214	148	226
		210	305	115	128	181
		502	328	207	160	101
		304	782	130	226	177
		682	320	195	107	113
		211	202	101	174	147
		395	462	103	119	185
		154	262	171	197	110
		168	193	205	194	111
		178	309	276	177	209
		124	762	100	142	113
		322	781	109	279	166
		482	270	117	365	122
		188	853	100	314	191
		472	584	166	292	331
		424	917	195	448	174
		567	231	119	107	131
		234	441	167	163	121
		157	387	110	236	158
		250	226	105	268	129
		263	264	210	109	246
		385	269	339	134	227
		493	218	153	209	336
		274	218	119	179	141
		543	239	682	112	100
		185	602	159	169	101
		421	241	391	420	161
		159	377	129	196	348
		627	860	168	120	205
		142	265	111	124	161
		117	242	178	113	145
		483	511	124	422	101
		530	274	190	232	146
		263	359	340	586	210
		145	155	208	303	188
		517	245	472	346	110
		501	195	373	195	134
		435	262	469	124	104
		324	133	180	133	197
		403	367	105	246	143
		305	424	128	116	126
		352	301	190	307	201
		160	316	113	191	225
		145	608	493	187	160
		619	400	130	879	126
		309	375	178	221	118
		228	526	127	358	290
		383	937	406	190	115
		498	690	185	211	174
		345	615	364	215
		457	251	111	125
		444	157	627	251
		257	323	113	120
		279	448	108	166
		255	705	118	399
		151	322	483	368
		441	535	105	252
		132	651	103	158
		410	263	332	176
		378	266	104	562
		167	392	263	175
		448	187	105	181
		281	226	115	151
		738	577	154	129
		229	320	314	132
		268	314	241	118
		765	350	133	220
		353	320	348	196
		169	587	159	265
		420	278	163	156
		525	334	261	130
		160	256	104	509
		210	650	403	188
		208	665	167	219
		244	214	352	183
		739	294	160	454
		362	228	460	144
		136	312	139	200
		241	199	107	351
		303	648	308	105
		196	246	153	130
		586	717	100	108
		813	440	160	260
		775	370	258	105
		195	438	425	202
		279	379	112	395
		257	508	345	164
		237	512	194	258
		537	548	206	298
		381	500	142	107
		145	559	279	388
		166	426	183	129
		307	965	151	131
		232	620	365	130
		551	747	156	189
		279	322	118	166
		245	371	314	273
		166	479	157	211
		879	306	292	119
		212	448	115	182
		302	257	100	277
		244	360	448	290
		204	282	161	194
		251	311	483	361
		437	248	104	205
		190	270	268	461
		300	549	109	113
		357	710	183	154
		646	650	209	106
		258	554	353	534
		242	405	169	569
		485	247	108	538
		368	520	420	140
		619	629	270	318
		272	473	100	265
		140	574	120	239
		339	320	160	404
		278	368	147	122
		152	400	124	130
		126	337	625	111
		364	202	203	175
		261	418	133	137
		970	406	120	190
		283	268	232	160
		151	352	156	104
		284	589	271	142
		244	322	196	406
		277	301	586	111
		346	204	790	108
		338	352	124	198
		314	578	131	151
		252	201	249	160
		594	303	108	255
		322	345	138	116
		589	736	195	858
		442	305	124	129
		446	424	133	274
		354	560	112	142
		183	635	438	176
		140	343	203	191
		127	581	307	121
		478	616	114	159
		179	460	456	671
		200	284	175	117
		351	330	114	199
		279	624	879	236
		377	298	115	209
		322	172	212	177
		184	211	206	173
		249	344	108	114
		190	221	302	273
		260	588	244	133
		200	265	204	104
		156	303	358	109
		679	253	190	332
		180	682	211	266
		318	257	308	165
		823	432	204	164
		853	488	251	236
		150	450	124	201
		481	260	120	276
		426	273	166	111
		538	371	485	187
		274	251	100	455
		691	219	368	374
		263	314	619	338
		426	303	150	130
		456	210	133	204
		473	314	165	112
		470	353	154	122
		290	936	184	227
		194	575	158	132
		160	534	322	377
		158	317	261	100
		494	515	888	141
		260	759	181	100
		428	272	151	166
		241	289	129	202
		240	332	109	335
		572	293	199	255
		676	327	257	139
		293	248	338	120
		370	257	220	166
		165	601	252	158
		263	214	530	545
		421	367	322	119
		142	342	589	109
		588	310	218	151
		734	314	319	539
		158	245	302	132
		538	130	183	138
		610	477	140	106
		640	786	127	130
		265	831	478	707
		132	599	179	270
		224	222	200	142
		278	208	351	103
		339	262	191	171
		476	144	280	105
		664	143	101	149
		234	272	130	564
		237	334	184	105
		286	176	182	204
		297	600	190	188
		271	231	260	101
		186	364	105	129
		184	219	100	688
		258	250	107	309
		287	233	149	187
		175	798	202	122
		565	256	395	143
		247	490	221	113
		382	509	318	119
		130	257	141	373
		282	295	646	320
		271	468	107	735
		142	480	388	119
		406	498	156	184
		190	904	150	295
		420	204	130	395
		358	395	189	154
		269	473	111	278
		369	683	368	119
		218	740	538	476
		375	280	115	119
		252	360	627	481
		232	299	130	145
		309	290	121	113
		374	443	143	103
		858	290	324	156
		221	567	182	313
		385	707	277	252
		297	580	133	466
		294	337	290	101
		326	124	194	146
		661	261	426	153
		218	542	123	314
		373	277	260	108
		212	277	280	166
		740	790	162	144
		222	265	541	122
		319	588	548	196
		182	417	113	264
		534	421	338	412
		661	354	163	252
		114	439	124	227
		389	296	111	198
		287	380	318	201
		123	263	100	109
		178	509	534	109
		265	471	569	188
		117	333	538	494
		970	874	114	344
		234	603	430	151
		322	233	120	303
		294	667	318	129
		339	548	265	343
		327	259	164	104
		359	281	114	481
		700	550	278	329
		216	374	133	264
		186	511	105	238
		133	316	272	142
		626	238	139	370
		992	931	476	119
		737	281	491	103
		165	407	177	126
		487	277	229	127
		336	643	214	556
		187	406	271	122
		134	236	186	910
		227	282	107	179
		132	748	198	106
		172	306	266	111
		488	352	175	104
		310	423	364	152
		366	483	128	330
		359	487	267	249
		309	1019	282	522
		402	607	115	174
		117	388	271
		644	255	104
		255	165	142
		527	307	406
		555	385	111
		542	344	420
		132	277	198
		212	142	151
		608	601	214
		116	211	121
		849	302	185
		608	167	165
		492	441	178
		364	480	252
		401	472	109
		198	480	314
		147	785	116
		704	388	858
		585	239	109
		152	492	103
		447	287	103
		1052	467	182
		348	515	274
		208	254	244
		199	634	213
		250	326	101
		441	350	238
		142	324	421
		314	768	118
		780	264	201
		224	368	159
		241	484	152
		203	187	740
		318	624	157
		228	387	199
		242	403	182
		174	645	534
		222	256	113
		242	565	177
		688	246	173
		674	640	114
		130	203	340
		187	678	287
		122	272	115
		137	477	158
		171	340	123
		322	579	178
		234	283	109
		455	299	306
		306	461	381
		686	346	234
		370	516	234
		735	183	185
		266	372	181
		342	560	114
		556	276	195
		1069	185	236
		185	374	508
		388	556	129
		330	222	558
		655	261	917
		255	335	633
		362	234	132
		658	800	165
		731	457	278
		280	362	296
		118	318	187
		451	217	115
		401	649	227
		738	369	132
		203	355	172
		339	451	377
		153	360	244
		165	307	279
		154	377	145
		340	281	252
		202	274	100
		231	296	236
		237	311	140
		433	451	197
		505	440	215
		715	366	527
		120	253	409
		303	556	343
		575	528	163
		772	263	131
		198	462	145
		358	556	139
		322	247	120
		134	474	397
		109		112
		169		116
		618		157
		386		204
		705		373
		382		545
		254		160
		279		109
		320		137
		154		178
		467		285
		519		123
		238		112
		101		594
		513		207
		627		107
		189		156
		411		152
		469		135
		315		447
		481		111
		692		122
		207		914
		324		348
		230		142
		932		199
		970		250
		608		198
		228		105
		697		174
		963		754
		373		117
		181		105
				155
				204
				128
				242
				174
				166
				234
				688
				248
				132
				309
				101
				187
				122
				171
				143
				234
				107
				117
				306
				477
				129
				370
				735
				266
				190
				111
				142
				354
				110
				1001
				117
				133
				185
				278
				183
				115
				565
				178
				133
				119
				179
				593
				731
				373
				149
				382
				401
				738
				101
				131
				163
				204
				153
				131
				111
				204
				128
				170
				177
				104
				121
				104
				157
				108
				433
				114
				274
				144
				438
				120
				144
				136
				102
				303
				431
				364
				256
				198
				256
				105
				180
				134
				109
				618
				249
				494
				344
				156
				211
				103
				185
				467
				208
				135
				176
				133
				167
				343
				104
				627
				189
				129
				132
				329
				273
				270
				424
				370
				169
				142
				103
				126
				164
				147
				104
				781
				910
				135
				179
				247
				122
				104
				110
				228
				120
				647
				841
				174
				181

## Sheet: Figure Supplement 5,6
	Data for Figure-Supplement-5C:						Data for Figure-Supplement-6A:
	% D-loops from DMA						% Cytosine conversion on pBSKS-
	37°C 30 min	37°C 4 hr	30°C 1 hr	RT 3 hr	RT 4 hr		45
	5.88235	5	2.49141	5.18518	5.2		41
	7.5	2.5	1.7	8			45
							45
							41
							41
							69
							61
							71
							75
							66
							64
							63
							51
							53
							49
							55
